# Supplementary material for: Glucosamine Interferes With Myelopoiesis and Enhances the Immunosuppressive Activity of Myeloid-Derived Suppressor Cells
Source: PubMed Central journal article supplement (PMC8660085; doi:10.3389/fnut.2021.762363), 2021-11-10
Supplement: Table_1.pdf [file Table_1.pdf]

Supplementary Table 1. The antibodies used for characterization of mouse hematopoietic stem cells

| Specificity | Fluorochrome | Clone   | Company       | Expression <sup>a</sup> |
|-------------|--------------|---------|---------------|-------------------------|
| CD41        | FITC         | MWReg30 | BD Bioscience | —                       |
| CD48        | FITC         | HM48-1  | BD Bioscience | —                       |
| Gr-1        | FITC         | RB6-8C5 | BD Bioscience | —                       |
| Ter119      | FITC         | TER-119 | BD Bioscience | —                       |
| B220        | FITC         | RA3-6B2 | BD Bioscience | —                       |
| CD150       | PE           | Q38-480 | BD Bioscience | —/+ <sup>a</sup>        |
| c-Kit       | APC          | 2B8     | BD Bioscience | +                       |
| Sca-1       | BB700        | D7      | BD Bioscience | +                       |

<sup>a</sup>CD150<sup>-</sup> expression refers to MPP, while CD150<sup>+</sup> expression refers to HSC.
