# Supplementary material for: Glucosamine Interferes With Myelopoiesis and Enhances the Immunosuppressive Activity of Myeloid-Derived Suppressor Cells
Source: PubMed Central journal article supplement (PMC8660085; doi:10.3389/fnut.2021.762363), 2021-11-10
Supplement: Table_2.pdf [file Table_2.pdf]

Supplementary Table 2. The antibodies used for characterization of mouse myeloid progenitor cells

| Specificity    | Fluorochrome          | Clone    | Company       | Expression <sup>a</sup> |
|----------------|-----------------------|----------|---------------|-------------------------|
| CD3            | Biotin                | 145-2C11 | BD Bioscience | —                       |
| CD4            | Biotin                | GK1.5    | BD Bioscience | —                       |
| CD8            | Biotin                | 53-6.7   | BD Bioscience | —                       |
| B220           | Biotin                | RA3-6B2  | BD Bioscience | —                       |
| Ter119         | Biotin                | TER-119  | BD Bioscience | —                       |
| Gr-1           | Biotin                | RB6-8C5  | BD Bioscience | —                       |
| IgM            | Biotin                | R6-60.2  | BD Bioscience | —                       |
| CD19           | Biotin                | 1D3      | eBioscience   | —                       |
| IL-7Ra         | Biotin                | B12-1    | BD Bioscience | —                       |
| CD34           | FITC                  | RAM34    | BD Bioscience | —/+ <sup>a</sup>        |
| FcγRIII/FcγRII | PE                    | 2.4G2    | BD Bioscience | —/+ <sup>a</sup>        |
| c-Kit          | APC                   | 2B8      | BD Bioscience | +                       |
| Streptavidin   | PE-Cy <sup>TM</sup> 7 | —        | BD Bioscience | —                       |
| Sca-1          | BB700                 | D7       | BD Bioscience | +                       |

<sup>a</sup> CD34<sup>-</sup> and FcγRIII/FcγRII<sup>-</sup> expression refers to MEP; CD34<sup>+</sup> and FcγRIII/FcγRII<sup>-</sup> expression refers to CMP; CD34<sup>+</sup> and FcγRIII/FcγRII<sup>+</sup> expression refers to GMP.
