# Supplementary material for: Glucosamine Interferes With Myelopoiesis and Enhances the Immunosuppressive Activity of Myeloid-Derived Suppressor Cells
Source: PubMed Central journal article supplement (PMC8660085; doi:10.3389/fnut.2021.762363), 2021-11-10
Supplement: Table_3.pdf [file Table_3.pdf]

Supplementary Table 3. The antibodies used for characterization of mouse myeloid cells

| Specificity | Fluorochrome | Clone   | Company       | Expression |
|-------------|--------------|---------|---------------|------------|
| CD45        | APC          | 30-F11  | BD Bioscience | +          |
| CD11b       | BB700        | M1/70   | BD Bioscience | +          |
| Gr-1        | PE           | RB6-8C5 | BD Bioscience | +          |
