# Supplementary material for: Glucosamine Interferes With Myelopoiesis and Enhances the Immunosuppressive Activity of Myeloid-Derived Suppressor Cells
Source: PubMed Central journal article supplement (PMC8660085; doi:10.3389/fnut.2021.762363), 2021-11-10
Supplement: Table_4.pdf [file Table_4.pdf]

Supplementary Table 4. The antibodies used for characterization of mouse MDSCs

| Specificity | Fluorochrome | Clone  | Company       | Expression            |
|-------------|--------------|--------|---------------|-----------------------|
| CD45        | APC          | 30-F11 | BD Bioscience | +                     |
| CD11b       | BB700        | M1/70  | BD Bioscience | +                     |
| Ly-6C       | BV421        | AL-22  | BD Bioscience | Low/High <sup>a</sup> |
| Ly-6G       | PE           | 1A8    | BD Bioscience | -/+ <sup>a</sup>      |

<sup>a</sup> Ly-6C<sup>Low</sup> and Ly-6G<sup>+</sup> refers to PMN-MDSC, while Ly-6C<sup>High</sup> and Ly-6G<sup>-</sup> refers to M-MDSC.
