# Supplementary material for: Glucosamine Interferes With Myelopoiesis and Enhances the Immunosuppressive Activity of Myeloid-Derived Suppressor Cells
Source: PubMed Central journal article supplement (PMC8660085; doi:10.3389/fnut.2021.762363), 2021-11-10
Supplement: Table_5.pdf [file Table_5.pdf]

Supplementary Table 5. The antibodies used for characterization of phosphorylated ERK1/2 and STAT3 in mouse myeloid cells

| Specificity        | Fluorochrome     | Clone     | Company       | Expression |
|--------------------|------------------|-----------|---------------|------------|
| CD11b              | APC              | M1/70     | BD Bioscience | +          |
| Gr-1               | PerCP-Cy™5.5     | RB6-8C5   | BD Bioscience | +          |
| ERK1/2-pT202/pY204 | Alexa Fluor® 488 | 20A       | BD Bioscience | +          |
| Stat3-pY705        | PE               | 4/P-STAT3 | BD Bioscience | +          |
