# Supplementary material for: Glucosamine Interferes With Myelopoiesis and Enhances the Immunosuppressive Activity of Myeloid-Derived Suppressor Cells
Source: PubMed Central journal article supplement (PMC8660085; doi:10.3389/fnut.2021.762363), 2021-11-10
Supplement: Table_6.pdf [file Table_6.pdf]

Supplementary Table 6. The antibodies used for characterization of mouse T cells

| Specificity | Fluorochrome | Clone  | Company       | Expression |
|-------------|--------------|--------|---------------|------------|
| Thy1.2      | APC          | 53-2.1 | eBioscience   | +          |
| CD8         | PE-Cy7       | 53-6.7 | BD Bioscience | +          |
